# Supplementary material for: Advances in dynamically controlled catalytic reaction engineering
Source: Royal Society of Chemistry journal article supplement (doi:10.1039/d0re00330a), 2020-01-01
Supplement: d0re00330a1.pdf [file d0re00330a1.pdf]

## Advances in Dynamically Controlled Catalytic Reaction Engineering

Cameron D. Armstrong and Andrew R. Teixeira

Electronic Supplementary Information

Table S1 summarizes a comprehensive literature review of natural and forced catalytic oscillations. When reported, turnover frequencies (TOFs) at reaction temperatures are directly tabulated. In instances where no TOF was reported, a secondary source was identified at comparable conditions and denoted by superscripts in the respective columns. The effective Damkholer number ( $Da_{eff} = TOF/f$ ) was then calculated as the ratio TOF to forced oscillation frequency. The full data set is visualized in Figure 7 of the manuscript.

**Table S1:** Tabulated natural and forced oscillations observed in catalytic systems.

| #  | Reference                                | Reaction                       | Condition        | Oscillation Type | Low Frequency (Hz) | High Frequency (Hz) | Reaction specific TOF (Hz) | Low Da (TOF/Frequency) | High Da (TOF/Frequency) |
|----|------------------------------------------|--------------------------------|------------------|------------------|--------------------|---------------------|----------------------------|------------------------|-------------------------|
| 1  | Brandner et al, 2004 <sup>1</sup>        | CO Oxidation                   | Temperature      | Forced           | -                  | 0.0166              | 0.033 <sup>2</sup>         | -                      | 2                       |
| 2  | Luther et al, 2008 <sup>3</sup>          | CO Oxidation                   | Temperature      | Forced           | -                  | 0.1                 | 0.033 <sup>2</sup>         | -                      | 0.333                   |
| 3  | Stolte et al, 2013 <sup>4</sup>          | CO Oxidation                   | Temperature      | Forced           | -                  | 20                  | 2 <sup>5</sup>             | -                      | 0.1                     |
| 4  | Jensen et al, 2007 <sup>6</sup>          | CO Oxidation                   | Temperature      | Forced           | 0.02               | 1                   | 0.033 <sup>2</sup>         | 1.67                   | 0.0333                  |
| 5  | Xu et al, 2018 <sup>7</sup>              | Rhodamine B Decomposition      | Vibration        | Forced           | -                  | 40000               | 2.5                        | -                      | 0.0000625               |
| 6  | Yukawa et al, 2002 <sup>8</sup>          | Ethanol Decomposition          | Vibration        | Forced           | 3500000            | 17400000            | 0.000033 <sup>9</sup>      | 9.5E-12                | 1.92E-12                |
| 7  | Muraki et al, 1985 <sup>10</sup>         | CO Oxidation                   | Concentration    | Forced           | 0.05               | 10                  | 0.0533 <sup>11</sup>       | 1.067                  | 0.00533                 |
| 8  | Zhou et al, 1986 <sup>12</sup>           | CO Oxidation                   | Concentration    | Forced           | -                  | 2                   | 0.0133 <sup>11</sup>       | -                      | 0.00667                 |
| 9  | Graham and Lynch, 1990 <sup>13</sup>     | CO Oxidation                   | Concentration    | Forced           | 0.0005             | 0.017               | 0.25                       | 500                    | 14.71                   |
| 10 | Zhou and Gulari, 1986 <sup>14</sup>      | CO Oxidation                   | Concentration    | Forced           | 0.02               | 0.1                 | 0.1 <sup>15</sup>          | 5                      | 1                       |
| 11 | Hu et al, 1998 <sup>16</sup>             | Methane Oxidation              | Reaction Induced | Natural          | 0.0001             | 0.01                | 0.00667 <sup>17</sup>      | 66.67                  | 0.667                   |
| 12 | Slavinskaya et al, 2011 <sup>18</sup>    | CO Oxidation                   | Reaction Induced | Natural          | 0.00416            | 0.033               | 0.0533 <sup>11</sup>       | 12.8                   | 1.6                     |
| 13 | Hendriksen et al, 2010 <sup>19</sup>     | CO Oxidation                   | Reaction Induced | Natural          | -                  | 0.00066             | 0.000667 <sup>5</sup>      | -                      | 75000                   |
| 14 | Kaichev et al, 2016 <sup>20</sup>        | Propane Oxidation              | Reaction Induced | Natural          | -                  | 0.00104             | 5.4                        | -                      | 5184                    |
| 15 | Delikonstantis et al, 2020 <sup>21</sup> | Non-Oxidative Methane Coupling | Plasma           | Forced           | 3000               | 100000              | 0.00001 <sup>22</sup>      | 3.3E-9                 | 1.0E-10                 |
| 16 | Yao et al, 2001 <sup>23</sup>            | Methane to Acetylene           | Plasma           | Forced           | 1000               | 8000                | 0.045 <sup>24</sup>        | 4.5E-5                 | 5.63E-6                 |
| 17 | Kado et al, 2003 <sup>25</sup>           | Methane to Acetylene           | Plasma           | Forced           | 45                 | 225                 | 0.045 <sup>24</sup>        | 0.0001                 | 0.0002                  |
| 18 | Deng et al, 2014 <sup>26</sup>           | Hydrogen Evolution Reaction    | Voltage          | Forced           | 20                 | 70                  | 3.93 <sup>27</sup>         | 0.196                  | 0.0561                  |
| 19 | Ohkawara et al, 1996 <sup>28</sup>       | Ethanol Oxidation              | Voltage          | Forced           | -                  | 84000               | 0.00317 <sup>29</sup>      | -                      | 3.77E-8                 |
| 20 | Fu et al, 1984 <sup>30</sup>             | Alkene Isomerization           | Light            | Forced           | 5                  | 25                  | 10000                      | 2000                   | 400                     |
| 21 | Pschenitz et al, 2016 <sup>31</sup>      | CO2 Reduction                  | Light            | Forced           | 500                | 10000               | 0.003055                   | 6.1E-6                 | 3.06E-7                 |

|    |                                           |                                                                                     |                        |        |           |          |                    |         |        |
|----|-------------------------------------------|-------------------------------------------------------------------------------------|------------------------|--------|-----------|----------|--------------------|---------|--------|
| 22 | Yamani, 2018 <sup>32</sup>                | Methylene Blue Decomposition                                                        | Light                  | Forced | -         | 10       | 1.11 <sup>33</sup> | -       | 0.111  |
| 23 | Kolbitsch et al, 2010 <sup>34</sup>       | Combustion                                                                          | Chemical Looping       | Forced | 0.0056    | 0.0415   | 11.9               | 2117.01 | 286.79 |
| 24 | Naqvi et al, 2005 <sup>35</sup>           | Combustion                                                                          | Chemical Looping       | Forced | -         | 0.00493  | 11.9               | -       | 2415.7 |
| 25 | Ryden et al, 2011 <sup>36</sup>           | Combustion                                                                          | Chemical Looping       | Forced | 0.00625   | 0.0175   | 11.9               | 1904    | 680    |
| 26 | De Diego et al, 2008 <sup>37</sup>        | Methane Combustion                                                                  | Chemical Looping       | Forced | 0.000185  | 0.00204  | 11.9               | 64260   | 5841.8 |
| 27 | Escudero et al, 2007 <sup>38</sup>        | Oxygen Reduction                                                                    | Impedance Spectroscopy | Forced | 0.01      | 1000000  | 100                | 10000   | 0.0001 |
| 28 | Wang and Rick, 2014 <sup>39</sup>         | Lithium Ion Battery                                                                 | Impedance Spectroscopy | Forced | 0.01      | 1000     | 0.5                | 50      | 0.0005 |
| 29 | Liang et al, 2015 <sup>40</sup>           | LiNi <sub>0.5</sub> CO <sub>0.2</sub> -Mn <sub>0.3</sub> O <sub>2</sub> Capacitance | Impedance Spectroscopy | Forced | 0.01      | 100000   | 20                 | 2000    | 0.0002 |
| 30 | Yoon et al, 2002 <sup>41</sup>            | PCR                                                                                 | PCR                    | Forced | 0.00833   | 0.166    | 1.25               | 150     | 7.5    |
| 31 | Woolley et al, 1996 <sup>42</sup>         | PCR                                                                                 | PCR                    | Forced | -         | 0.033    | 1.25               | -       | 37.5   |
| 32 | Farrar and Wittwer, 2015 <sup>43</sup>    | PCR                                                                                 | PCR                    | Forced | 0.0485    | 1.25     | 1.25               | 25.75   | 1      |
| 33 | Abulesz and Lyberatos, 1988 <sup>44</sup> | Yeast biomass production                                                            | Bioreactor             | Forced | 0.0000694 | 0.000138 | 0.0000842          | 1.21    | 0.606  |
| 34 | Pickett and Bazin, 1979 <sup>45</sup>     | E. Coli growth and composition                                                      | Bioreactor             | Forced | 0.0000463 | 0.00111  | 0.0000463          | 1       | 0.0417 |
| 35 | Panic et al, 2011 <sup>46</sup>           | Ferrocyanide electrooxidation                                                       | Frequency Response     | Forced | 0.01      | 10000    | 10                 | 1000    | 0.001  |
| 36 | Petkovska and Do, 1998 <sup>47</sup>      | Langmuir kinetic simulation                                                         | Frequency Response     | Forced | 0.0000138 | 13.8     | 0.0138             | 1000    | 0.001  |

## Supplemental Citations

- 1 J. J. Brandner, G. Emig, M. A. Liauw and K. Schubert, *Chem. Eng. J.*, 2004, **101**, 217–224.
- 2 M. Haneda, T. Watanabe, N. Kamiuchi and M. Ozawa, *Appl. Catal. B Environ.*, 2013, **142–143**, 8–14.
- 3 M. Luther, J. J. Brandner, L. Kiwi-Minsker, A. Renken and K. Schubert, *Chem. Eng. Sci.*, 2008, **63**, 4955–4961.
- 4 J. Stolte, L. Özkan, P. C. Thüne, J. W. Niemantsverdriet and A. C. P. M. Backx, *Appl. Therm. Eng.*, , DOI:10.1016/j.applthermaleng.2012.06.035.
- 5 P. J. Berlowitz, C. H. F. Peden and D. W. Goodman, *Kinetics of CO Oxidation on Single-Crystal Pd, Pt, and Ir*, 1988, vol. 92.
- 6 S. Jensen, J. L. Olsen, S. Thorsteinsson, O. Hansen and U. J. Quaade, *Catal. Commun.*, 2007, **8**, 1985–1990.
- 7 X. Xu, Y. Jia, L. Xiao and Z. Wu, 2018, **193**, 1143–1148.
- 8 Y. Yukawa, N. Saito, H. Nishiyama and Y. Inoue, in *Surface Science*, 2002, vol. 502–503, pp. 527–531.
- 9 P. Ferrin, D. Simonetti, S. Kandoi, E. Kunkes, J. A. Dumesic, J. K. Nørskov and M. Mavrikakis, , DOI:10.1021/ja8099322.

- 10 H. Muraki, H. Sobukawa and Y. Fujitani, *Nippon KAGAKU KAISHI*, 1985, **1985**, 176–181.
- 11 M. Haneda, M. Todo, Y. Nakamura and M. Hattori, *Catal. Today*, 2017, **281**, 447–453.
- 12 X. Zhou, Y. Barshad and E. Gulari, *CO OXIDATION ON Pd/Al<sub>2</sub>O<sub>3</sub>. TRANSIENT RESPONSE AND RATE ENHANCEMENT THROUGH FORCED CONCENTRATION CYCLING*, 1986, vol. 41.
- 13 W. R. C. Graham and D. T. Lynch, *AIChE J.*, 1990, **36**, 1796–1806.
- 14 X. Zhou and E. Gulari, *Chem. Eng. Sci.*, 1986, **41**, 883–890.
- 15 K. Murata, E. Eleeda, J. Ohyama, Y. Yamamoto, S. Arai and A. Satsuma, *Phys. Chem. Chem. Phys.*, 2019, **21**, 18128.
- 16 Y. H. Hu and E. Ruckenstein\*, , DOI:10.1021/IE980027F.
- 17 X. Zhang, S. D. House, Y. Tang, L. Nguyen, Y. Li, A. A. Opalade, J. C. Yang, Z. Sun and F. Feng Tao, , DOI:10.1021/acssuschemeng.8b00234.
- 18 E. M. Slavinskaya, O. A. Stonkus, R. V. Gulyaev, A. S. Ivanova, V. I. Zaikovskii, P. A. Kuznetsov and A. I. Boronin, *Appl. Catal. A Gen.*, 2011, **401**, 83–97.
- 19 B. L. M Hendriksen, M. D. Ackermann, R. van Rijn, D. Stoltz, I. Popa, O. Balmes, A. Resta, D. Wermeille, R. Felici, S. Ferrer and J. W. M Frenken, 2010, 11.
- 20 V. V. Kaichev, D. Teschner, A. A. Saraev, S. S. Kosolobov, A. Y. Gladky, I. P. Prosvirin, N. A. Rudina, A. B. Ayupov, R. Blume, M. Hävecker, A. Knop-Gericke, R. Schlögl, A. V. Latyshev and V. I. Bukhtiyarov, *J. Catal.*, 2016, **334**, 23–33.
- 21 E. Delikonstantis, M. Scapinello, O. Van Geenhoven and G. D. Stefanidis, *Chem. Eng. J.*, 2020, **380**, 122477.
- 22 Y. Engelmann, P. Mehta, E. C. Neyts, W. F. Schneider and A. Bogaerts, *ACS Sustain. Chem. Eng.*, 2020, **8**, 6043–6054.
- 23 S. Yao, A. Nakayama and E. Suzuki, *AIChE J.*, 2001, **47**, 413–418.
- 24 Y. Xiao and A. Varma, *ACS Catal.*, 2018, **8**, 2735–2740.
- 25 S. Kado, K. Urasaki, Y. Sekine and K. Fujimoto, 2003, 1377–1385.
- 26 Q. Deng, M. Smetanin and J. Weissmüller, *J. Catal.*, 2014, **309**, 351–361.
- 27 K. Jiang, B. Liu, M. Luo, S. Ning, M. Peng, Y. Zhao, Y.-R. Lu, T.-S. Chan, F. M. F. De Groot and Y. Tan, *Nat. Commun.*, 2019, **10**, 1743.
- 28 Y. Ohkawara, N. Saito and Y. Inoue, *Surf. Sci.*, 1996, **357–358**, 777–780.
- 29 F. Kaedi, Z. Yavari, M. Noroozifar and H. Saravani, *J. Electroanal. Chem.*, 2018, **827**, 204–212.
- 30 K.-Ji. Fu, R. L. Whetten and E. R. Grant, *Pulsed-Laser-Initiated Photocatalysis in the Liquid Phase*, 1984, vol. 23.
- 31 M. Pschenitza, S. Meister, A. von Weber, A. Kartouzian, U. Heiz and B. Rieger, *ChemCatChem*, 2016, **8**, 2688–2695.
- 32 Z. H. Yamani, B. Zain and H. Yamani, *Arab J Sci Eng*, 2018, **43**, 423–432.

- 33 X.-M. Song, J.-M. Wu and M. Yan, *Thin Solid Films*, 2009, **517**, 4341–4347.
- 34 P. Kolbitsch, J. Bolhàr-Nordenkamp, T. Pröll and H. Hofbauer, *Int. J. Greenh. Gas Control*, 2010, **4**, 180–185.
- 35 R. Naqvi, J. Wolf and O. Bolland, *Energy*, 2007, **32**, 360–370.
- 36 M. Rydén, A. Lyngfelt and T. Mattisson, *Int. J. Greenh. Gas Control*, 2011, **5**, 356–366.
- 37 L. F. de Diego, M. Ortiz, J. Adánez, F. García-Labiano, A. Abad and P. Gayán, *Chem. Eng. J.*, 2008, **144**, 289–298.
- 38 M. J. Escudero, A. Aguadero, J. A. Alonso and L. Daza, *J. Electroanal. Chem.*, 2007, **611**, 107–116.
- 39 F. M. Wang and J. Rick, *Solid State Ionics*, 2014, **268**, 31–34.
- 40 C. Liang, L. Liu, Z. Jia, C. Dai and Y. Xiong, *Electrochim. Acta*, 2015, **186**, 413–419.
- 41 D. S. Yoon, Y.-S. Lee, Y. Lee, H. J. Cho, S. W. Sung, K. W. Oh, J. Cha and G. Lim, *Precise temperature control and rapid thermal cycling in a micromachined DNA polymerase chain reaction chip*, 2002, vol. 12.
- 42 A. T. Woolley, D. Hadley, P. Landre, A. J. deMello, R. A. Mathies and M. Allen Northrup, *Functional Integration of PCR Amplification and Capillary Electrophoresis in a Microfabricated DNA Analysis Device*, 1996, vol. 68.
- 43 J. S. Farrar and C. T. Wittwer, *Clin. Chem.*, 2015, **61**, 145–153.
- 44 E.-M. Abulesz and G. Lyberatos, *Biotechnol. Bioeng.*, 1988, **34**, 741–749.
- 45 A. M. Pickett and M. J. Bazin, 1979.
- 46 V. V. Panic, T. R. Vidakovi C-Koch, M. Andri, M. Petkovska and K. Sundmacher, *J. Phys. Chem. C*, 2011, **115**, 17352–17358.
- 47 M. Petkovska and D. D. Do, *Nonlinear frequency response of adsorption systems: isothermal batch and continuous flow adsorbers*, 1998, vol. 53.
